# Supplementary material for: Mapping of Craniofacial Traits in Outbred Mice Identifies Major Developmental Genes Involved in Shape Determination
Source: PLoS Genet. 2015 Nov 2;11(11):e1005607. doi: 10.1371/journal.pgen.1005607 (PMC4629907; doi:10.1371/journal.pgen.1005607)
Supplement: S1 Table — (PDF) [file pgen.1005607.s001.pdf]

**Table S1.** Description of skull and mandible landmark positions used in the geometric morphometrics analysis.

| Landmark        | Description                                                                                       |
|-----------------|---------------------------------------------------------------------------------------------------|
| <b>Skull</b>    |                                                                                                   |
| 1               | Nasal bones most anterior suture                                                                  |
| 2               | Nasal bones most posterior suture                                                                 |
| 3               | Frontal bones most posterior suture                                                               |
| 4               | Parietal bones most posterior suture                                                              |
| 5               | Interparietal bone most posterior point on the median line                                        |
| 6               | Right side, most anterior point of the suture between frontal and parietal bones                  |
| 7               | Left side, most anterior point of the suture between frontal and parietal bones                   |
| 8               | Right side, intersection between parietal, occipital and squamosal bones                          |
| 9               | Left side, intersection between parietal, occipital and squamosal bones                           |
| 10              | Right, most posterior junction of squamosal bone and the zygomatic process of the squamosal bone  |
| 11              | Left, most posterior junction of squamosal bone and the zygomatic process of the squamosal bone   |
| 12              | Right side, most anterior suture of the zygomatic process of the squamosal bone and jugal bone    |
| 13              | Left side, most anterior suture of the zygomatic process of the squamosal bone and jugal bone     |
| 14              | Right side, most anterior suture of jugal bone and the zygomatic process of the maxillary bone    |
| 15              | Left side, most anterior suture of jugal bone and the zygomatic process of the maxillary bone     |
| 16              | Right side, intersection of the frontal, lacrimal and the zygomatic process of the maxillary bone |
| 17              | Left side, intersection of the frontal, lacrimal and the zygomatic process of the maxillary bone  |
| 18              | Right infraorbital foramen most superior point                                                    |
| 19              | Left infraorbital foramen most superior point                                                     |
| 20              | Right infraorbital foramen most inferior point                                                    |
| 21              | Left infraorbital foramen most inferior point                                                     |
| 22              | Right premaxilla-right nasal bone most anterior point of suture                                   |
| 23              | Left premaxilla-left nasal bone most anterior point of suture                                     |
| 24              | Most superior point of the right incisor alveolus                                                 |
| 25              | Most superior edge of the left incisor alveolus                                                   |
| 26              | Most inferior point of the right incisor alveolus                                                 |
| 27              | Most inferior point of the left incisor alveolus                                                  |
| 28              | Right premaxilla-maxilla most ventral junction                                                    |
| 29              | Left premaxilla-maxilla most ventral junction                                                     |
| 30              | Most anterior point of the right first molar alveolus                                             |
| 31              | Most anterior point of the left first molar alveolus                                              |
| 32              | Most posterior point of the right third molar alveolus                                            |
| 33              | Most posterior point of the left third molar alveolus                                             |
| 34              | Most anterior point of the right anterior palatine foramen                                        |
| 35              | Most anterior point of the left anterior palatine foramen                                         |
| 36              | Most posterior point of the right anterior palatine foramen                                       |
| 37              | Most posterior point of the left anterior palatine foramen                                        |
| 38              | Right pterygoid process, most posterior point                                                     |
| 39              | Left pterygoid process, most posterior point                                                      |
| 40              | Median-line point of the suture between occipital and basisphenoid bones                          |
| 41              | Median-line point of the suture between basisphenoid and presphenoid bones                        |
| 42              | Most posterior point of the suture between palatine bones                                         |
| 43              | Foramen magnum most anterior point, Basion                                                        |
| 44              | Foramen magnum most posterior point, Bregma                                                       |
| <b>Mandible</b> |                                                                                                   |
| 1               | Most superior point of the incisor alveolus                                                       |
| 2               | Most inferior point of the incisor alveolus                                                       |
| 3               | Most anterior point of the first molar alveolus                                                   |
| 4               | Most posterior point of the third molar alveolus                                                  |
| 5               | Most posterior tip of the coronoid process                                                        |

---

|    |                                                                 |
|----|-----------------------------------------------------------------|
| 6  | Most anterior concave point of coronoid process                 |
| 7  | Most anterior point of the articular surface of the condyle     |
| 8  | Most posterior tip of the condyle                               |
| 9  | Most anterior concave point between condyle and angular process |
| 10 | Most posterior tip of angular process                           |
| 11 | Most inferior point of angular process                          |
| 12 | Ascending ramus dorsal-most ventral point                       |
| 13 | Alveolar region most inferior point                             |

---
