# Supplementary material for: Mapping of Craniofacial Traits in Outbred Mice Identifies Major Developmental Genes Involved in Shape Determination
Source: PLoS Genet. 2015 Nov 2;11(11):e1005607. doi: 10.1371/journal.pgen.1005607 (PMC4629907; doi:10.1371/journal.pgen.1005607)
Supplement: S3 Fig — 26 genomic regions were chosen randomly and their overlap with previous studies was calculated, this was repeated 1000 times. (a) overlap between 1-Mb regions and the results from Attanasio et al 2014. (b) overlap between 500-Kb regions and Attanasio et al 2014. (c) overlap of 1-Mb regions and Maga et al 2015. (PDF) [file pgen.1005607.s008.pdf]

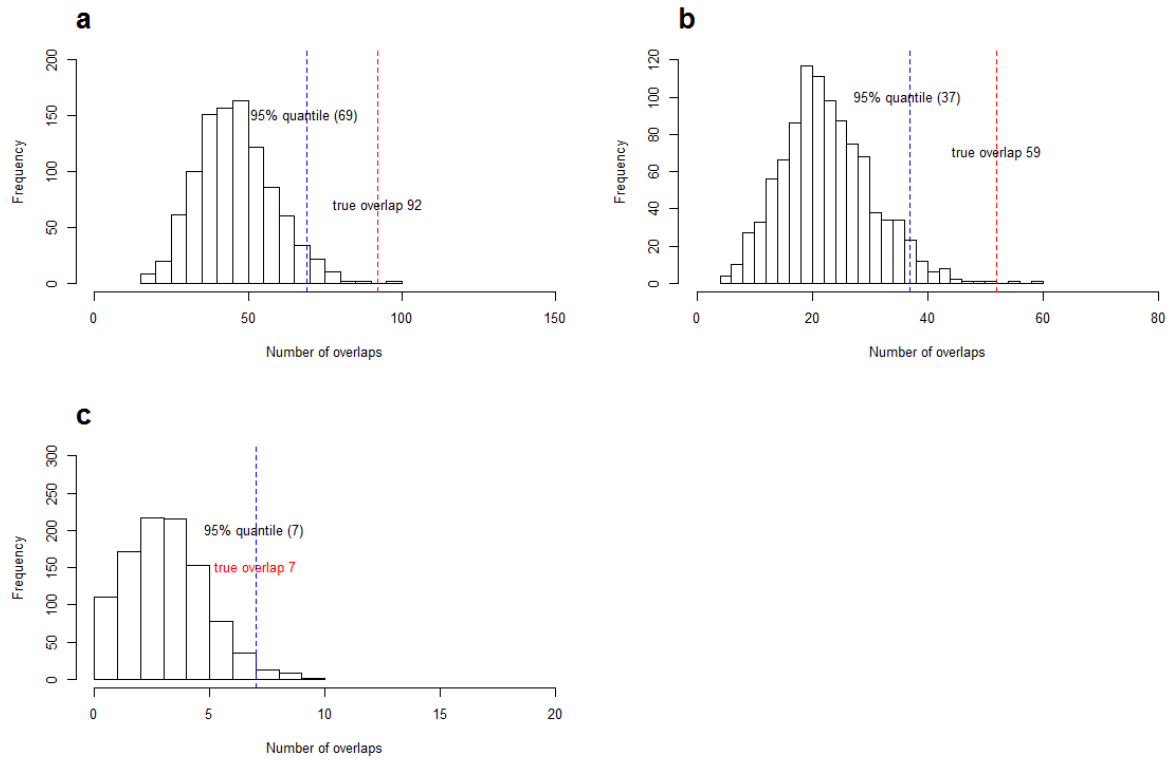

**Figure S3. Overlap with previous studies.** 26 genomic regions were chosen randomly and their overlap with previous studies was calculated, this was repeated 1000 times. (a) overlap between 1Mb regions and the results from Attanasio *et al* 2014. (b) overlap between 500 Kb regions and Attanasio *et al* 2014. (c) overlap of 1Mb regions and Maga *et al* 2015.
