# Supplementary material for: 院内製剤0.5%ガンシクロビル点眼の安定性および有効性の検討
Source: PLOS journal article supplement (doi:10.1371/journal.pgen.1005607), 2012-01-01
Supplement: S12 (10.1371/journal.pgen.1005607.s012) [file journal.pgen.1005607.s012]

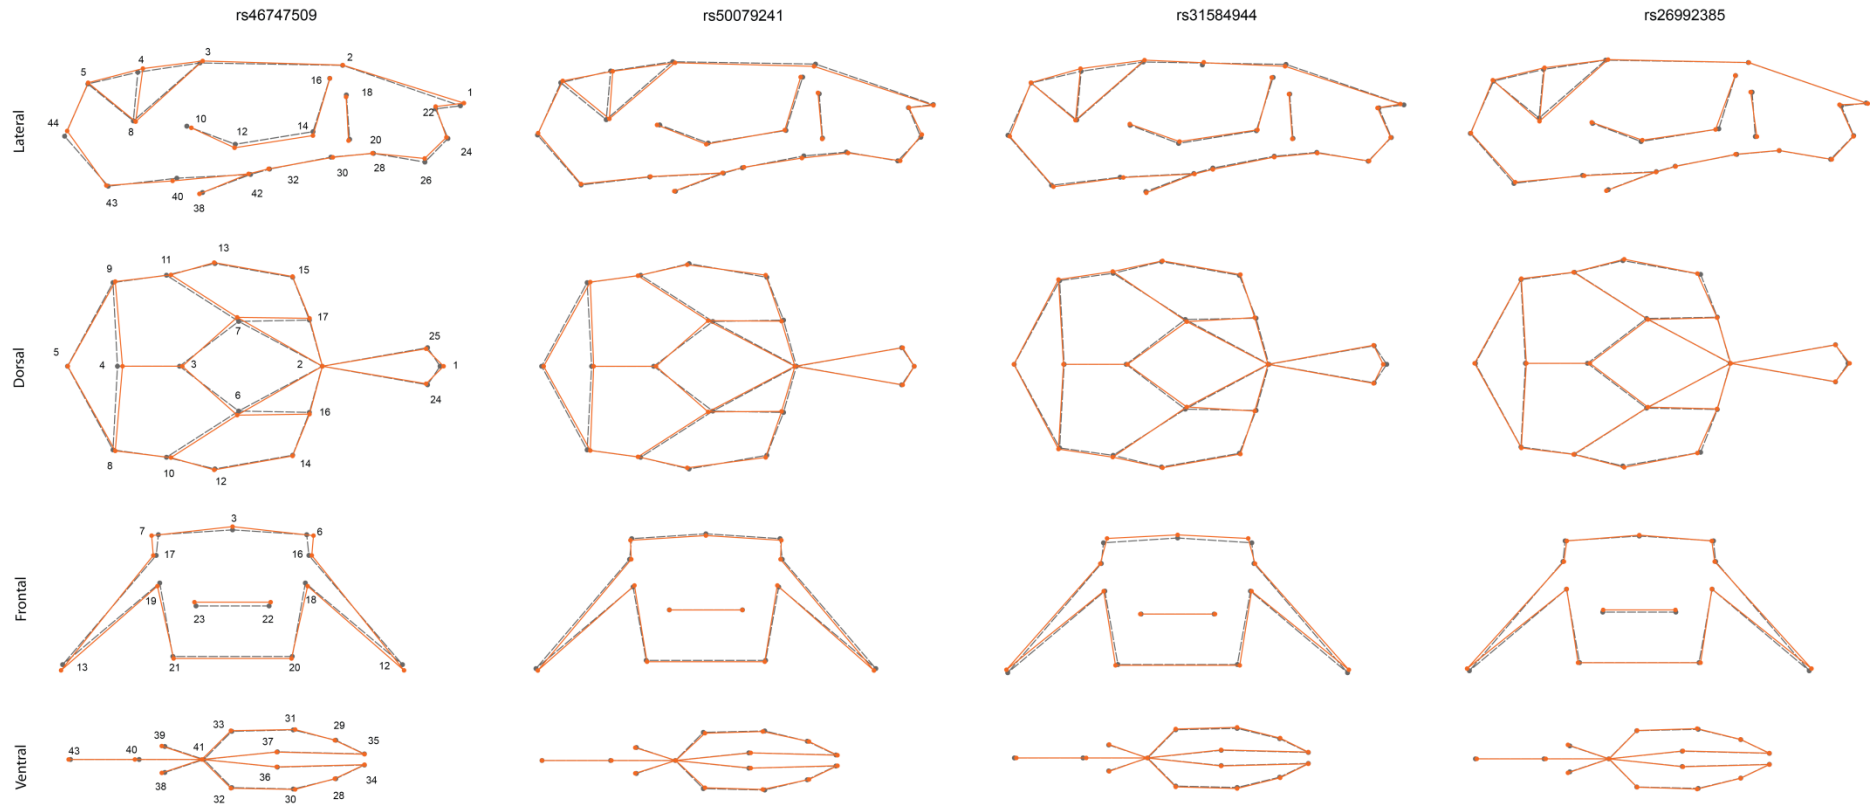

**Figure S7. Two-dimensional representation of the 3D changes in skull shape associated to the significant SNPs.** SNPs rs26992385, rs46747509, rs50079241, and rs31584944 are shown. In grey (dotted lines) is the population's mean mandible shape. In orange (continuous line) is the shape represented by the regression vector of skull shape on SNP genotype (scale, 10x). Lateral, dorsal, frontal, and ventral views, as well as the relevant landmarks (solid dots) for each view are shown.
